# Supplementary material for: Characterisation and beneficial effects of a Lupinus angustifolius protein hydrolysate obtained by immobilisation of the enzyme alcalase®
Source: Royal Society of Chemistry journal article supplement (doi:10.1039/d3fo05086f), 2024-01-01
Supplement: d3fo05086f1.pdf [file d3fo05086f1.pdf]

## Supplementary materials

### Characterisation and beneficial effects of a *Lupinus angustifolius* protein hydrolysate obtained by immobilisation of the enzyme alcalase®

Guillermo Santos-Sánchez<sup>a,b</sup>, Ivan Cruz-Chamorro<sup>a,b,\*</sup>, José Carlos Márquez-López<sup>c</sup>, Justo Pedroche<sup>c</sup>, Ana Isabel Álvarez-López<sup>a,b</sup>, María del Carmen Millán-Linares<sup>b</sup>, Patricia Judith Lardone<sup>a,b</sup>, Antonio Carrillo-Vico<sup>a,b,\*</sup>

**Table S1.** Composition of experimental Western diet

| Ingredients                             | %     |
|-----------------------------------------|-------|
| <b>Fat (2.12 kcal/g)</b>                |       |
| Lard                                    | 20.68 |
| Soybean oil                             | 2.91  |
| <b>Carbohydrate (1.65 kcal/g)</b>       |       |
| Sucrose                                 | 20.09 |
| Maltodextrin                            | 11.65 |
| Dextrin                                 | 8.48  |
| Powdered cellulose                      | 5.82  |
| <b>Protein (0.83 kcal/g)</b>            |       |
| Casein - vitamin tested                 | 23.30 |
| <b>Vitamin Mix</b>                      | 1.16  |
| <b>Mineral Mix</b>                      | 1.16  |
| <b>Food additives</b>                   |       |
| Potassium citrate. Tribasic monohydrate | 1.92  |
| Calcium phosphate                       | 1.51  |
| Calcium carbonate                       | 0.64  |
| L-Cystine                               | 0.35  |
| Choline bitartrate                      | 0.23  |
| Food colouring (FD&C Red No.40)         | 0.05  |
| <b>Total energy (4.60 kcal/g)</b>       |       |
| Fat (ether extract)                     | 46.1  |
| Carbohydrates                           | 35.8  |
| Protein                                 | 18.1  |

Ingredients percentage of the high-fat Western diet and energy provided from the different macromolecules. The detailed description of the WD diet is available in <sup>1</sup>.

## References

<sup>1</sup> TestDiet, 58V8 - 45 kcal % Fat, <https://www.testdiet.com/Diets/High-Fat-DIO/index.html>).
